# Supplementary material for: RAB5B: explore its carcinogenic potential and understand its role, prognostic value and biological significance in pan-cancer
Source: Frontiers journal article supplement (doi:10.3389/fimmu.2025.1619733), 2025-08-06
Supplement: Image_1.pdf [file Image_1.pdf]

# TCGA、GETx、Target datasets

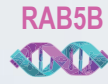

Cancers with samples < 3 were removed

## Transcriptional analyses

### Expression differences

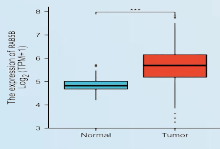

### Survival

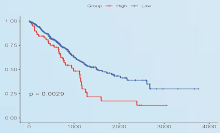

### Enrichment analysis

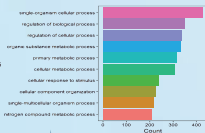

## Genomic landscape

Ploidy

TMB

MSI

HRD

Neoantigen

Genomic Instability

SNV

CNV

## Alternative Splicing

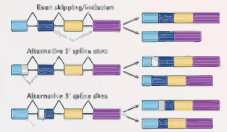

## Bioinformatic Analyses

### Cancer Immunity

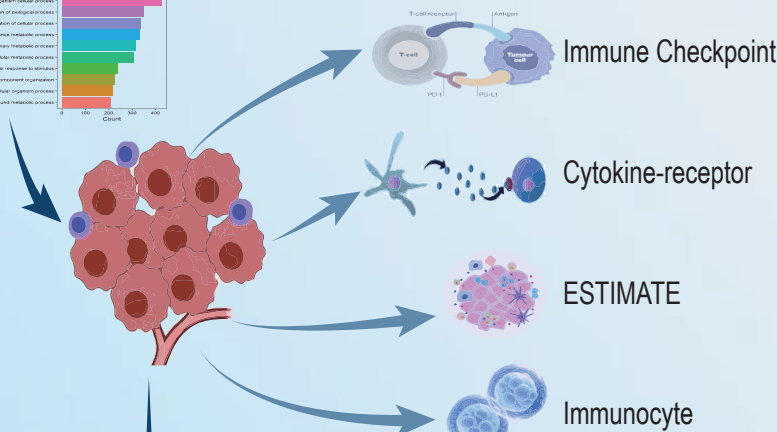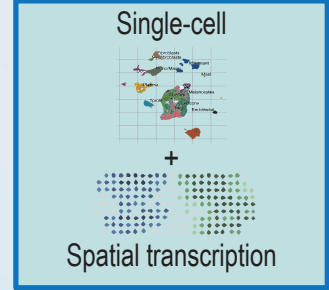

### Chemotherapy

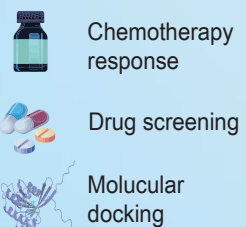

## Experimental Validation

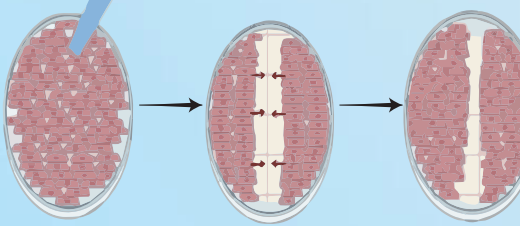

Cell Scratch Assay

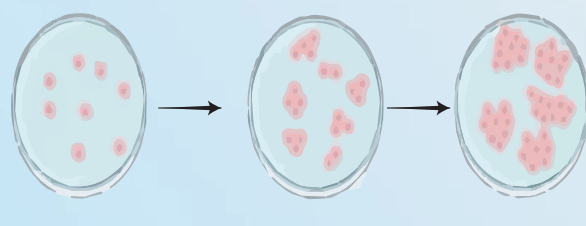

Colony formation assay
